# Supplementary material for: Extended π conjugation in 2H-1,4,2-diazaphosphole complexes
Source: Royal Society of Chemistry journal article supplement (doi:10.1039/c0nj00151a), 2010-01-01
Supplement: c0nj00151a.pdf [file c0nj00151a.pdf]

# Extended $\pi$ conjugation in 2*H*-1,4,2-diazaphosphole complexes

Holger Helten,<sup>a</sup> Jörg Daniels,<sup>a</sup> Martin Nieger,<sup>b</sup> and Rainer Streibel\*<sup>a</sup>

## Supplementary material Details on TD-DFT calculations

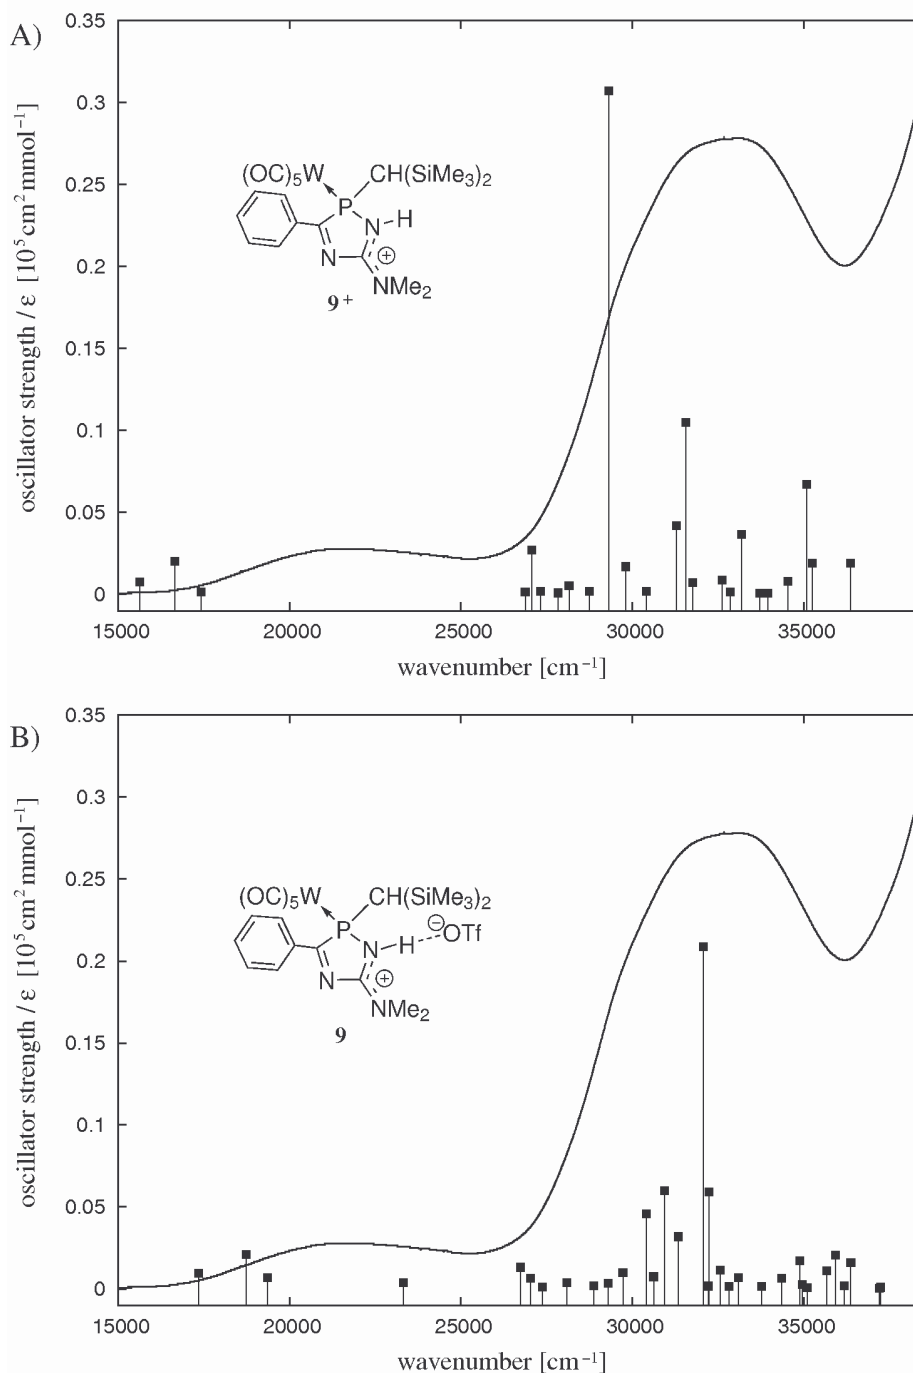

**Fig. S.1** Comparison of the experimental UV/Vis spectrum of **9** ( $\text{CH}_2\text{Cl}_2$ ; solid line) with calculated vertical singlet excitations for cation  $9^+$  (A) and contact ion pair **9** (B) (TD-B3LYP/SV(P)/ECP-60-MWB(W) // RI-BLYP/SV(P)/ECP-60-MWB(W)).

**Table S.1** Selected vertical singlet excitations calculated for the cation  $9^+$  (only the major orbital contributions given).

| No. | $\nu$ [ $\text{cm}^{-1}$ ] | Oscillator strength | Orbital contributions                                           | $ \text{cl}^2 $ [%] |
|-----|----------------------------|---------------------|-----------------------------------------------------------------|---------------------|
| 1   | 15630                      | 0.008               | <b>HOMO</b> ( $d_2$ ) $\rightarrow$ <b>LUMO</b> ( $\pi^*$ )     | 84                  |
| 2   | 16661                      | 0.020               | <b>HOMO-1</b> ( $d_1$ ) $\rightarrow$ <b>LUMO</b> ( $\pi^*$ )   | 84                  |
| 5   | 27071                      | 0.027               | <b>HOMO-5</b> ( $\pi_3$ ) $\rightarrow$ <b>LUMO</b> ( $\pi^*$ ) | 74                  |
|     |                            |                     | <b>HOMO-3</b> ( $\pi_2$ ) $\rightarrow$ <b>LUMO</b> ( $\pi^*$ ) | 15                  |
| 10  | 29317                      | 0.307               | <b>HOMO-3</b> ( $\pi_2$ ) $\rightarrow$ <b>LUMO</b> ( $\pi^*$ ) | 44                  |
|     |                            |                     | <b>HOMO-4</b> ( $\pi_1$ ) $\rightarrow$ <b>LUMO</b> ( $\pi^*$ ) | 28                  |

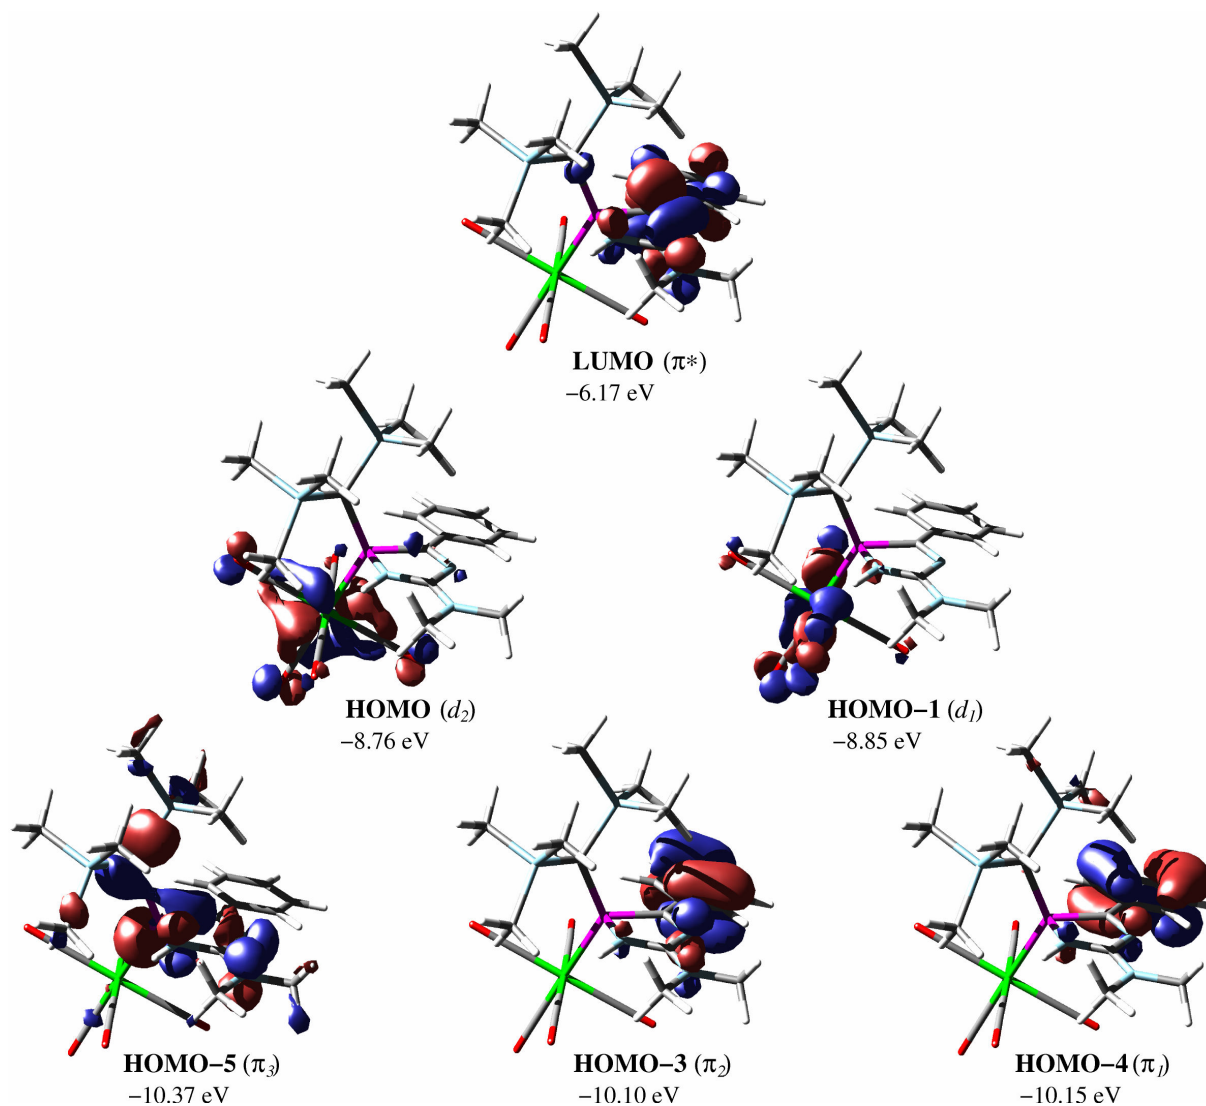

**Fig. S.2** Visualization of selected molecular orbitals calculated for the cation  $9^+$  (B3LYP/SV(P)/ECP-60-MWB(W); isovalue 0.04 au).

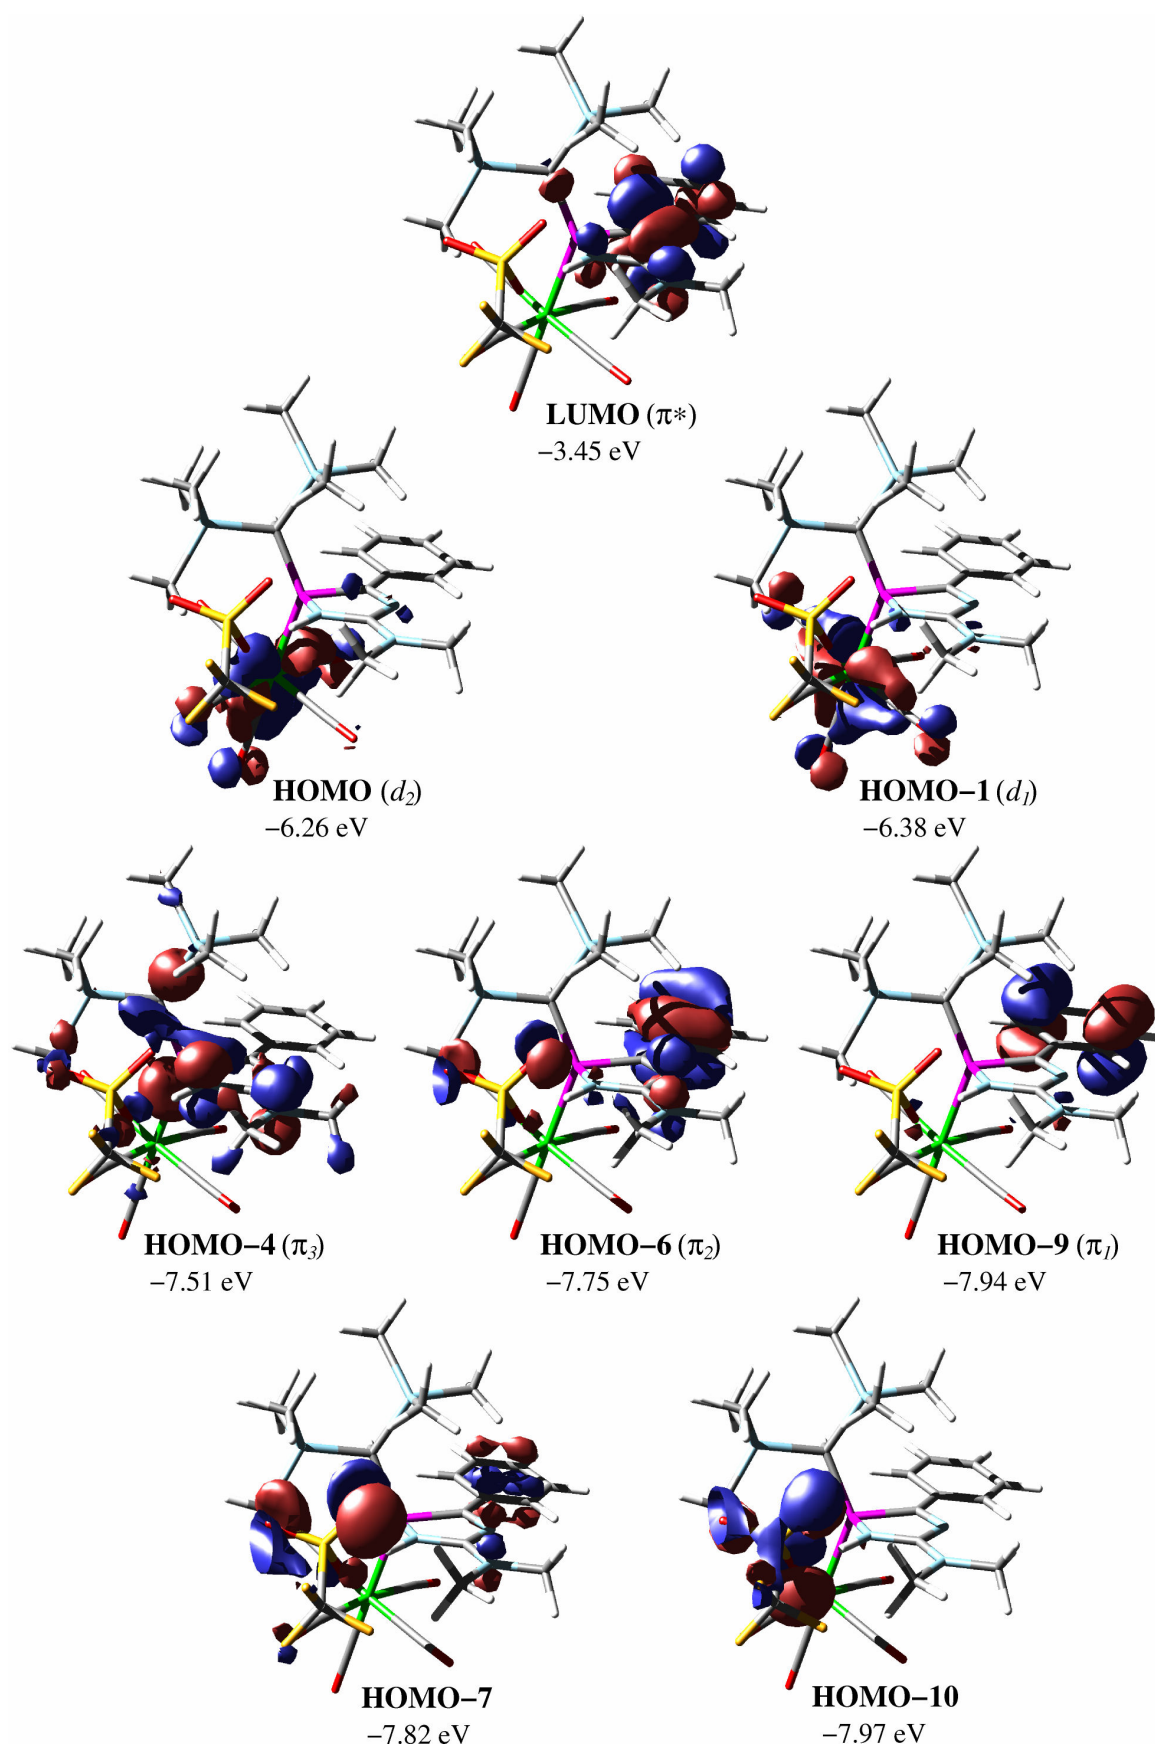

**Fig. S.3** Visualization of selected molecular orbitals calculated for the contact ion pair **9** (B3LYP/SV(P)/ECP-60-MWB(W); isovalue 0.04 au).

**Table S.2** Selected vertical singlet excitations calculated for **3b** (only the major orbital contributions given).

| No. | $\nu$ [ $\text{cm}^{-1}$ ] | Oscillator strength | Orbital contributions                                           | $ \text{cl}^2 $ [%] |
|-----|----------------------------|---------------------|-----------------------------------------------------------------|---------------------|
| 1   | 20596                      | 0.002               | <b>HOMO</b> ( $d_2$ ) $\rightarrow$ <b>LUMO</b> ( $\pi^*$ )     | 99                  |
| 2   | 21326                      | 0.017               | <b>HOMO-1</b> ( $d_1$ ) $\rightarrow$ <b>LUMO</b> ( $\pi^*$ )   | 99                  |
| 4   | 24498                      | 0.051               | <b>HOMO-3</b> ( $\pi_3$ ) $\rightarrow$ <b>LUMO</b> ( $\pi^*$ ) | 96                  |
| 13  | 30564                      | 0.147               | <b>HOMO-4</b> ( $\pi_2$ ) $\rightarrow$ <b>LUMO</b> ( $\pi^*$ ) | 48                  |
| 19  | 33960                      | 0.051               | <b>HOMO-6</b> ( $\pi_1$ ) $\rightarrow$ <b>LUMO</b> ( $\pi^*$ ) | 87                  |

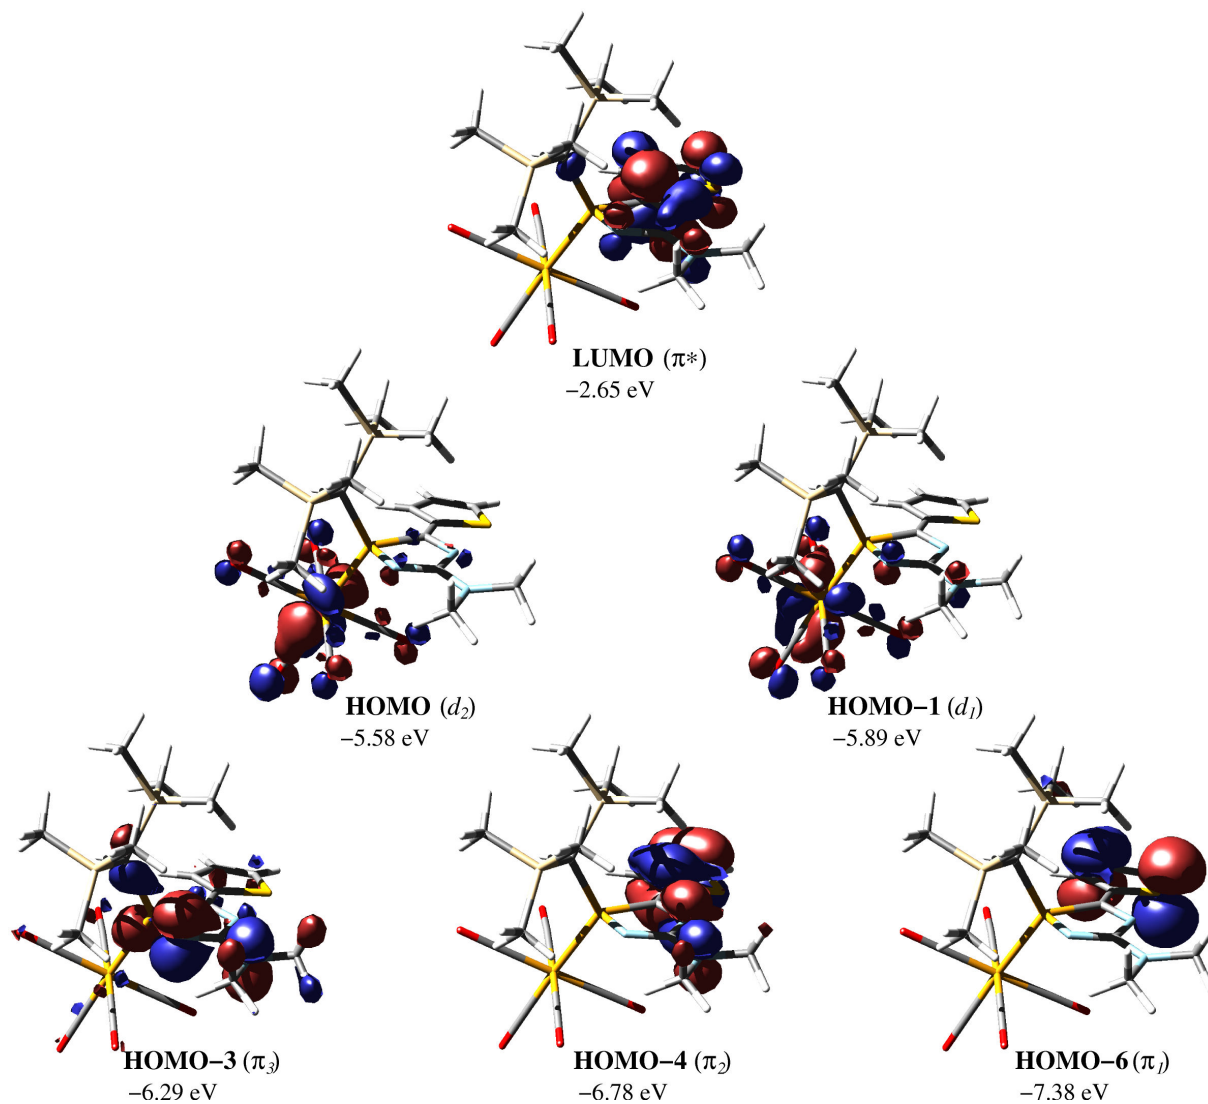

**Fig. S.4** Visualization of selected molecular orbitals calculated for **3b** (B3LYP/SV(P)/ECP-60-MWB(W); isovalue 0.04 au).

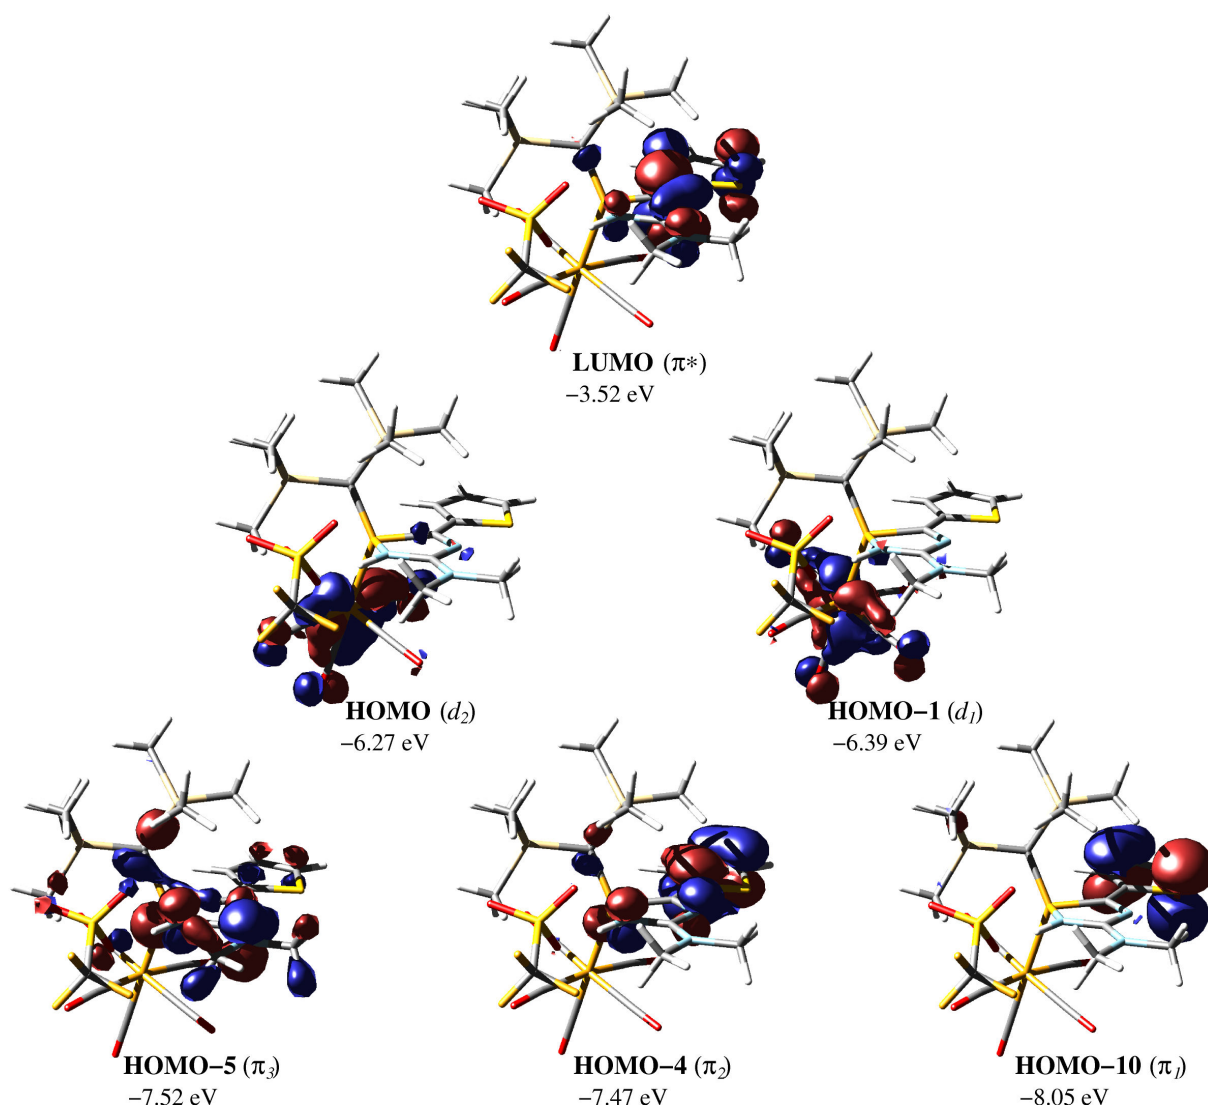

**Fig. S.5** Visualization of selected molecular orbitals calculated for **4** (B3LYP/SV(P)/ECP-60-MWB(W); isovalue 0.04 au).
